# Supplementary material
Source: PubMed Central journal article supplement (PMC2667797)
Supplement: 0901083106_0901083106SI.pdf [file 0901083106_0901083106SI.pdf]

# Supporting Information

Shenoy et al. 10.1073/pnas.0901083106

## SI Methods

**Reagents.** Polyubiquitin chains with Lys-48 or Lys-63 linkages were from Boston Biochem. Endogenous USP33 in HEK-293 cells was detected with an antibody purchased from Bethyl Laboratories. FK2 antibody was from Biomol. DNA and siRNA transfections were performed with the Lipofectamine2000 reagent (Invitrogen); siRNA transfections were also done with Genesilencer reagent (Genlantis). USP33 gene (IMAGE: 3491447) was cloned into pCDNA3-HA, pEGFP-N1, pD-SRED-C1 vectors by standard cloning protocols, and the DNA constructs were verified by sequencing. C. Nanoff (Medical University of Vienna) kindly provided the USP4 plasmid.

**RNA Interference.** Chemically synthesized, double-stranded siRNAs, with 19-nt duplex RNA and 2-nt 3' dTdT overhangs were purchased from Dharmacon in deprotected and desalted form. The siRNA sequences (sense, 5' to 3') that target respective human mRNA are listed below:

Control: Nontargeting sequence used was UUCUC-CGAACGUGUCACGU

$\beta$ -arrestin2: GGACCGCAAAGUGUUUGUG

Mdm2: GCCAUUGCUIUUUGAAGUUA

USP33-1 CAAUGUAAUUCAGGAUGA

USP33-2 GGCUUGGAUCUUCAGCCAU

USP33-3 GAUCAUGUGGCGAAGCAUA

For experiments in Figs. 3 C and D, and 4 A and C, early-passage HEK-293 cells that were 40–50% confluent on 100-mm dishes were transfected with siRNA, using the Genesilencer transfection reagent. The cells were assayed 48–60 hr after transfection. For immunostaining experiments (Fig. 4B) 70–80% confluent cells were transfected with Lipofectamine 2000 and cells were assayed 48–60 hr after transfection.

**Immunoprecipitation and Immunoblotting.** Cells were solubilized in a lysis buffer (LB) containing 50 mM Hepes (pH 7.5), 0.5% Nonidet P-40, 250 mM NaCl, 2 mM EDTA, 10% (vol/vol) glycerol, 1 mM sodium orthovanadate, 1 mM sodium fluoride, 1 mM phenylmethylsulfonyl fluoride, leupeptin (5  $\mu$ g/ml), aprotinin (5  $\mu$ g/ml), pepstatin A (1  $\mu$ g/ml), and benzaminidine (100  $\mu$ M). Soluble extracts were mixed with FLAG M2 affinity beads and rotated at 4 °C overnight. For experiments that involved stabilization of ubiquitinated  $\beta$ -arrestin (Figs. 3C, 4A, 5A, and Fig. S6), 10 mM NEM was included in the lysis buffers. Nonspecific binding was eliminated by repeated washes with LB and bound protein was eluted with SDS sample buffer. The proteins were separated on a polyacrylamide gradient gel (4–20%, Invitrogen) and transferred to nitrocellulose membrane for Western blotting. Chemiluminescence detection was performed by using SuperSignal West Pico reagent (Pierce). Mdm2 detection at endogenous levels required West Femto reagent (Pierce). Protein bands were quantified by densitometry and analyzed with Genetools software (SynGene).

**USP33 Purification.** COS-7 cells grown in 150-mm dishes were transfected with either pCDNA3-HA or pCDNA3-HA-USP33. Cells were harvested 24–30 hr after transfection in an EDTA-free lysis buffer (LB) containing 50 mM Hepes (pH 7.5), 0.5% Nonidet P-40, 250 mM NaCl, 10% (vol/vol) glycerol, 1 mM sodium orthovanadate, 1 mM sodium fluoride, 1 mM phenylmethylsulfonyl fluoride, leupeptin (5  $\mu$ g/ml), aprotinin (5  $\mu$ g/ml), pepstatin A (1  $\mu$ g/ml), and benzaminidine (100  $\mu$ M). Clarified supernatant was mixed with anti-HA affinity agarose

beads and rotated at 4 °C. Repeated steps of centrifugation and washes eliminated nonspecific binding, and bound HA-USP33 was eluted by competing with HA peptide (60–100  $\mu$ g of peptide per mL). Eluted protein was concentrated with Vivaspın ultra-filtration spin columns (50,000 molecular weight cutoff; Vivascience). About 600  $\mu$ g of HA-USP33 enzyme was obtained from monolayer COS-7 cells collected from 6–8 150-mm dishes; 5  $\mu$ g was used for testing purity on Coomassie-stained gels (Fig. S2A); and 0.5–2.0  $\mu$ g was used in various enzymatic assays.

**Ub-VS Labeling.** We assessed the accessibility of active site of HA-USP33 by incubating 5- to 10-fold excess Ub-vinyl sulfone over HA-USP33 for 30 min at 37 °C in 50 mM Tris-HCl (pH 7.5) and 1 mM DTT. The reactions were stopped by addition of 3 $\times$  SDS sample buffer and boiling. The samples were separated on a Tris-glycine 6% polyacrylamid gel (Invitrogen) and protein bands were detected by SYPRO-Ruby staining.

**In Vitro Deubiquitination Assays.** One microgram of polyubiquitin chain (Lys-48 or Lys-63) was incubated at 37 °C with buffer (50 mM Tris-HCl, pH 8.0), 0.5  $\mu$ g of purified USP33 or 0.1  $\mu$ g of Isopeptidase T in the presence of 1 mM DTT and 5 mM MgCl<sub>2</sub>. The reactions were terminated by the addition of SDS sample buffer and samples were analyzed by SDS/PAGE and Coomassie blue staining.

**In Vitro USP33 Binding.** Purified  $\beta$ -arrestin2-His<sub>6</sub> was mixed in a volume of 50  $\mu$ L with 3–5  $\mu$ g of HA-USP33 alone or with 5-fold excess (mole:mole) of receptor C-terminal peptide (either V2R nonphosphopeptide: ARGRTPPSLGPODESCCTASSSLAK-DTSS, V2R phosphopeptide: ARGRTPPSLGPODESCCTASSSLAKDTSS (phosphorylated at the underlined residues),  $\beta$ <sub>2</sub>AR-nonphosphopeptide: QGTVPDNDISQGRNCSTND-SLL, or  $\beta$ <sub>2</sub>AR-phosphopeptide: QGTVPDNDISQGRNCSTND-SLL) and incubated for 30 min, after which Talon beads were added, volume was increased to 500  $\mu$ L and samples were rotated at 4 °C. Nonspecific binding was eliminated by repeated centrifugation and wash steps. Bound proteins were analyzed by Western blotting for USP33 and  $\beta$ -arrestin2 levels.

**Confocal Microscopy.** Confocal images were obtained on a Zeiss LSM510 laser scanning microscope (LSM) using a 100 $\times$  oil-immersion objective and the pinhole set to 1.0 Airy units for single fluorophore imaging. For multichannel acquisition, multitrack sequential excitation (488, 568, 633 nm) and emission (515–540 nm GFP; 585–615 nm, Texas Red; 650 nm, Alexa633) filter sets were used and the pinholes were adjusted so that each channel has the same optical slice (= 1  $\mu$ m). Fixed cells were scanned at room temperature and live cell images were acquired on a 37 °C heated stage. Images were imported into Adobe Photoshop 7.0, and brightness and contrast were adjusted in Photoshop for the entire LSM image.

HEK-293 cells expressing HA-V2R (Fig. 2 B and C) or Flag- $\beta$ <sub>2</sub>AR (Fig. 4B) plated on 10-cm dishes were transiently transfected with pcDNA3 or USP33 (Fig. 2 B and C) or with control or USP33 siRNA (Fig. 4B). Cells were plated on collagen-coated 35-mm glass-bottom plates 36–40 hr after transfection; 12–15 hr later, cells were starved for at least 2 hr in serum-free medium before stimulation. After stimulation, cells were fixed with 5% formaldehyde diluted in PBS containing calcium and magnesium. Fixed cells were permeabilized with 0.01% Triton X-100 in PBS containing 2% BSA for 60 min and

then incubated at 4 °C with appropriate primary antibodies. The secondary antibody incubations were for 1 hr at room temperature followed by repeated washes with PBS. Although USP33 is detected across membrane network, vesicle, and perinuclear compartments (Fig. S3A), when 2 or more fluorophores are analyzed, the apparent distribution is seen only in the perinuclear region and/or vesicles. This results from the lower efficacy of rabbit Alexa633 and some attenuation of signals during the multichannel signal acquisition.

**Limited Tryptic Proteolysis.** Rat  $\beta$ -arrestin2 was purified as previously described [Xiao K, Shenoy SK, Nobles K, Lefkowitz RJ (2004) Activation-dependent conformational changes in  $\beta$ -arrestin 2. *J Biol Chem* 279:55744–55753]. A 5:1 molar ratio of

receptor peptides (see above) to  $\beta$ -arrestin2 (0.5–1 mg/mL) was used to reveal the effects of peptide on limited tryptic proteolysis of  $\beta$ -arrestin2. Before proteolysis,  $\beta$ -arrestin2, in the absence or presence of peptide, was incubated at room temperature for 30 min. A 1:5,000 (trypsin/ $\beta$ -arrestin2) wt/wt ratio of TPCK-treated trypsin was added to the mixture. The samples were incubated at 37 °C for indicated times. At each time point, 5  $\mu$ L (2.5–5  $\mu$ g of  $\beta$ -arrestin2) was removed from each reaction. Each aliquot was transferred to a new microcentrifuge tube containing 5  $\mu$ L of 2 $\times$  SDS sample buffer and boiled for 5 min to quench the tryptic digestion. The samples were run on 4–20% gradient gels (Invitrogen) to determine the effects of ligands on the digestion pattern of  $\beta$ -arrestin2.





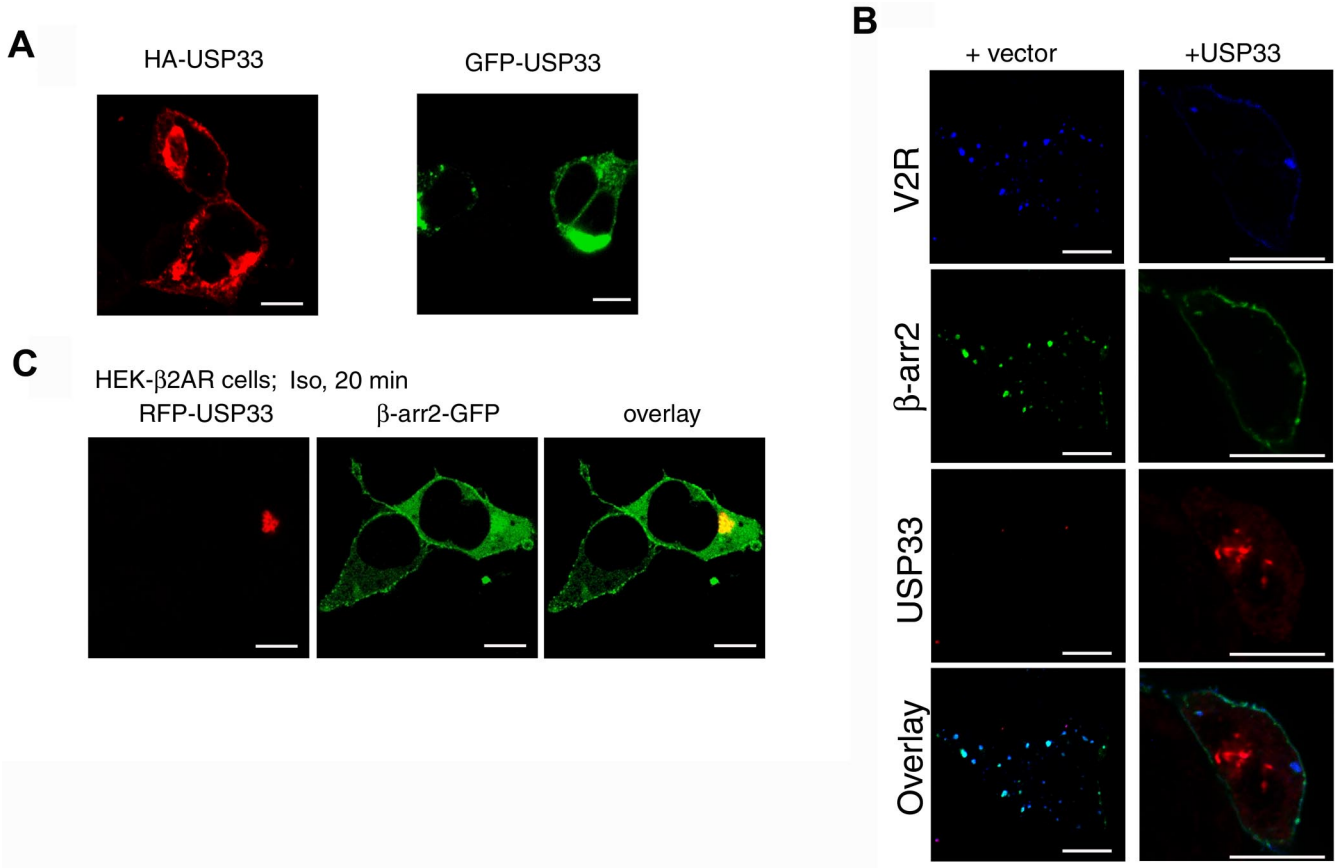

**Fig. S3.** (A) HEK-293 cells showing distribution of HA-USP33 (Left) and GFP-USP33 (Right). (B) Confocal micrographs depict HEK-293 cells expressing HA-V2R (blue),  $\beta$ -arrestin2-GFP (green), and USP33 (red). Displayed are the subcellular distributions of each protein in cells that have been stimulated with 1  $\mu$ M AVP for 10 min. (C) HEK-293 cells with stable Flag- $\beta$ 2AR transiently transfected with  $\beta$ -arrestin2-GFP and RFP-USP33, stimulated with 1  $\mu$ M isoproterenol for 20 min. (C) shows 2 cells, one with no detectable RFP-USP33 and the other cell that expresses USP33, both with plasma membrane recruitment of  $\beta$ -arrestin. (Scale bars, 10  $\mu$ m.)

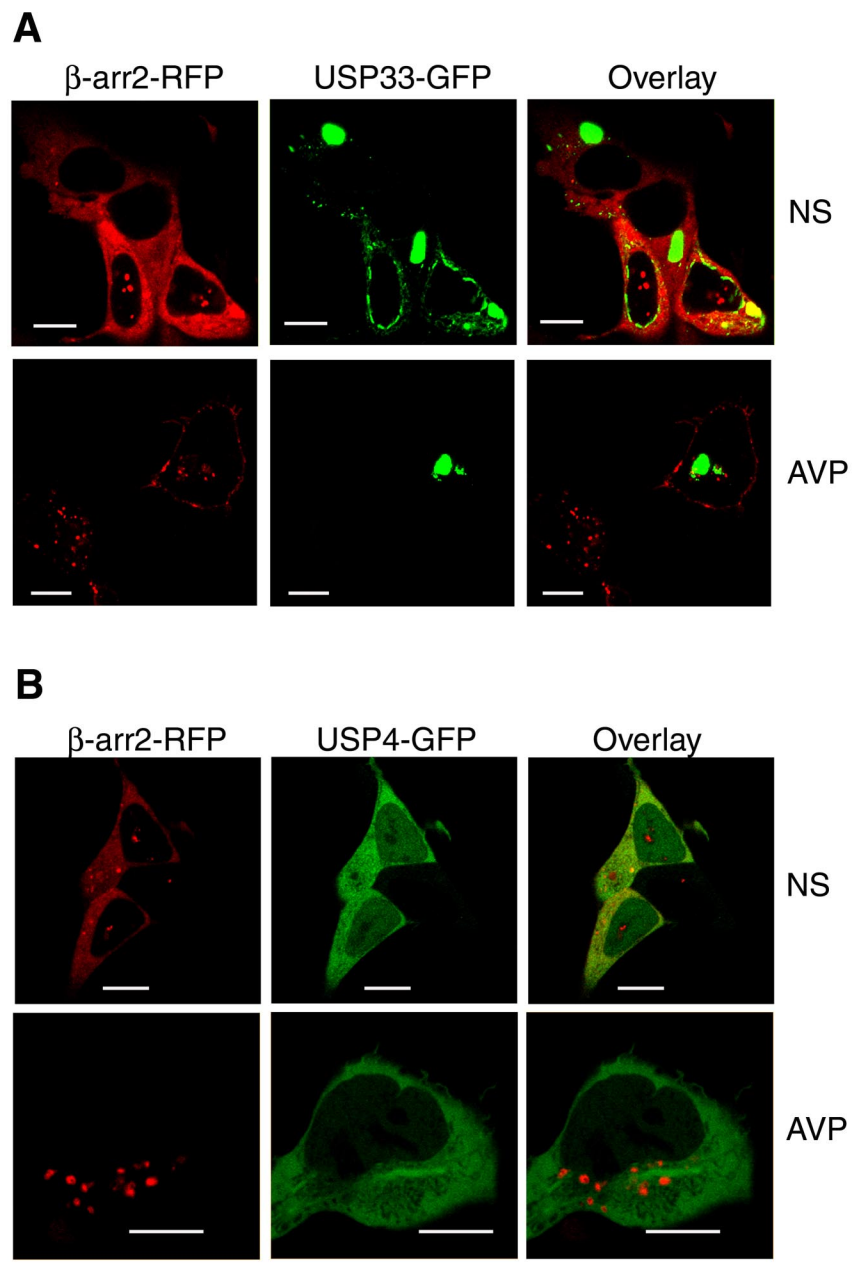

**Fig. S4.** (A) Confocal micrographs displaying  $\beta$ -arrestin2-RFP (red), USP33-GFP (green), and HA-V2R in unstimulated cells (*Upper*) and AVP-stimulated cells (*Lower*). (B) Confocal micrographs displaying  $\beta$ -arrestin2-RFP (red), USP4-GFP (green), and HA-V2R in unstimulated cells (*Upper*) and AVP-stimulated cells (*Lower*). (Scale bars, 10  $\mu$ m.)





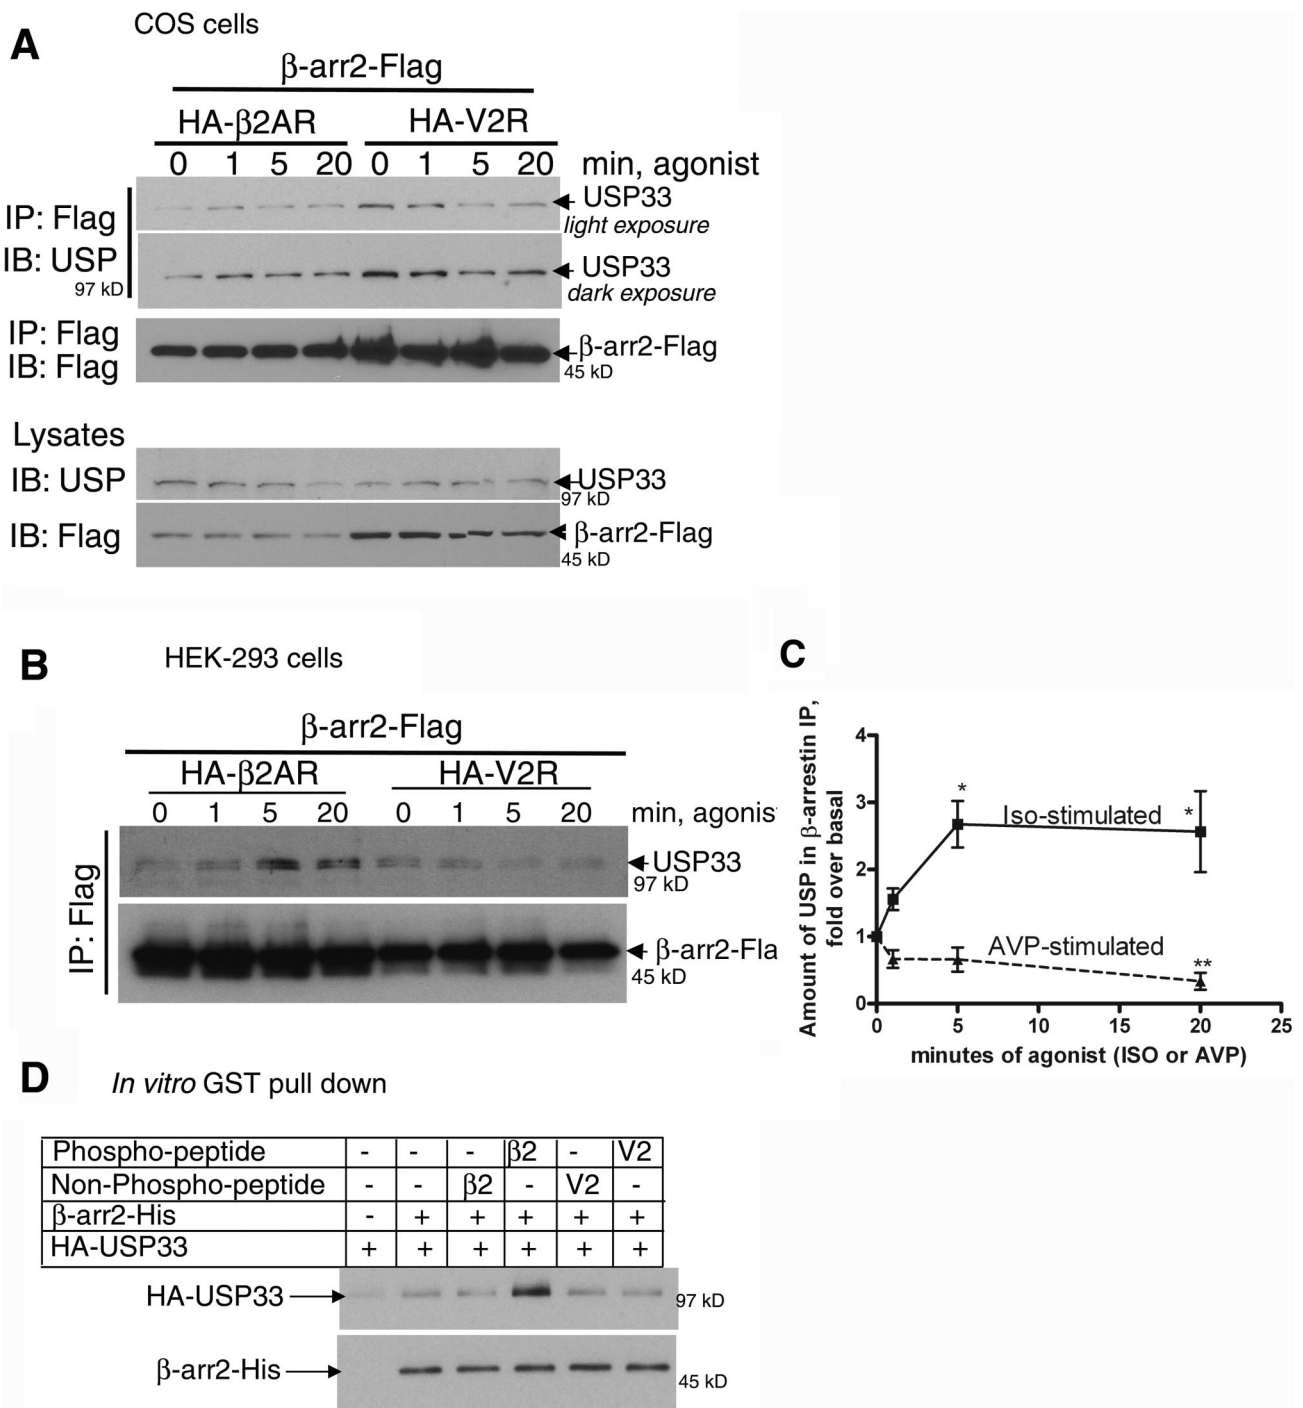

**Fig. S6.** (A) COS-7 cells transiently expressing either HA- $\beta$ 2AR or HA-V2R along with  $\beta$ -arrestin2-Flag were stimulated with respective agonists for the indicated times,  $\beta$ -arrestins were immunoprecipitated, and the immunoprecipitate was probed with USP33 antisera (first and second gels) and for  $\beta$ -arrestin in the immunoprecipitate sample as detected by an anti-Flag M2 antibody (third gel). The levels of USP33 and  $\beta$ -arrestin in whole-cell extracts as detected by the respective antibodies are also displayed in the 2 lower gels. (B) HEK-293 cells transiently expressing either HA- $\beta$ 2AR or HA-V2R along with  $\beta$ -arrestin2-Flag were stimulated with respective agonists for the indicated times,  $\beta$ -arrestins were immunoprecipitated, and the immunoprecipitate was probed with anti-USP33 antibody (*Upper*) and for  $\beta$ -arrestin in the immunoprecipitate sample as detected by an anti-Flag M2 antibody (*Lower*). (C) Quantification of USP33 in  $\beta$ -arrestin precipitates obtained from 3 independent experiments. The 4 time points within each binding curve are analyzed by 1-way ANOVA. In each case, stimulated samples are significantly different from unstimulated samples; \*,  $P < 0.05$ ; \*\*,  $P < 0.01$ . (D) HA-USP33 was incubated alone or with  $\beta$ -arrestin2-His<sub>6</sub> without or with indicated receptor peptides ( $\beta$ -arrestin:USP33:peptide 1:1:5 molar ratio). The protein mixture was mixed with Talon affinity beads and bound proteins were separated from unbound sample by repeated washing and analyzed by Western blotting for USP33 (*Upper*) and  $\beta$ -arrestin (*Lower*) in each sample.
